# Supplementary material for: Endothelial Antioxidant-1: a Key Mediator of Copper-dependent Wound Healing in vivo
Source: PubMed Central journal article supplement (PMC5036036; doi:10.1038/srep33783), 2016-09-26
Supplement: srep33783-s1.pdf [file srep33783-s1.pdf]

## SUPPLEMENTARY INFORMATION

### **Endothelial Antioxidant-1: a Key Mediator of Copper-dependent Wound Healing *in vivo***

Archita Das<sup>1</sup>, Sudhahar Varadarajan<sup>1,2</sup>, Gin-Fu Chen<sup>1</sup>, Ha Won Kim<sup>1</sup>,  
Seock-Won Youn<sup>3</sup>, Lydia Finney<sup>4</sup>, Stefan Vogt<sup>4</sup>, Jay Yang<sup>5</sup>, Junghun Kweon<sup>1,2+</sup>,  
Bayasgalan Surenkhuu<sup>1,2</sup>, Masuko Ushio-Fukai<sup>3</sup>, Tohru Fukai<sup>1,2</sup>

From <sup>1</sup>Departments of Medicine (Section of Cardiology) and Pharmacology, Center for Cardiovascular Research, Center for Lung and Vascular Biology, University of Illinois at Chicago, Chicago, IL60612

<sup>2</sup>Jesse Brown Veterans Affairs Medical Center, Chicago, IL60612

<sup>3</sup>Department of Pharmacology, Center for Lung and Vascular Biology, Center for Cardiovascular Research, University of Illinois at Chicago, Chicago, IL60612

<sup>4</sup>Argonne National Laboratory, IL60439

<sup>5</sup>Department of Anesthesiology, University of Wisconsin, Madison, WI 53792

Short running title: Endothelial Atox1 and wound healing

Address correspondence to:

Tohru Fukai, M.D., Ph.D.  
Depts. of Medicine (Section of Cardiology) and Pharmacology,  
Center for Cardiovascular Research,  
University of Illinois at Chicago,  
835 S. Wolcott, M/C868  
E403 MSB  
Chicago, IL60612  
Phone: 312-996-7631 (office)  
Fax: 312-996-1225  
Email: tfukai@uic.edu

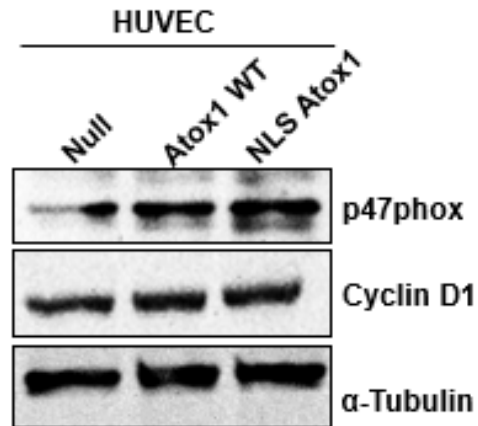

**Supplemental Figure 1. Nuclear-targeted Atox1 increases expression of Atox1 target proteins (p47phox and cyclin D1) in ECs.** HUVECs infected with adenovirus expressing Atox1-WT or Atox1 with nuclear-target sequence (Atox1-NLS) were used to measure p47phox, cyclin D1, or  $\alpha$ -tubulin (loading control) protein expression using western analysis.
